# Supplementary material for: One-step hydrothermal synthesis of nitrogen-doped carbon dots as a super selective and sensitive probe for sensing metronidazole in multiple samples
Source: Royal Society of Chemistry journal article supplement (doi:10.1039/d1ay01009c), 2021-01-01
Supplement: d1ay01009c1.pdf [file d1ay01009c1.pdf]

## **Electronic Supplementary Information**

### **One-step Hydrothermal Synthesis of Nitrogen-doped Carbon Dots as a Super Selective and Sensitive Probe for Sensing of Metronidazole in Multiple samples**

Jinyan Du<sup>\*[1]</sup>, Chaofeng Wang<sup>[1]</sup>, Pingchuan Yuan<sup>[2]</sup>, Qin Shu<sup>[1]</sup>, Na Xu<sup>[1]</sup>, Ying  
Yang<sup>[1]</sup>, Shuangqing Qi<sup>[1]</sup>, Yin Ye<sup>[1]</sup>, Changqing Zhu<sup>[1]</sup>

[1] Anhui Key Laboratory of Chemo-Biosensing, Key Laboratory of Functional  
Molecular Solids, Ministry of Education, College of Chemistry and Materials Science,  
Anhui Normal University, Wuhu, 241000, PR China.

[2] Anhui Provincial Engineering Research Center for Polysaccharide Drugs, School  
of Pharmacy, Wannan Medical College, Wuhu 241000, China.

\*Corresponding authors, E-mail addresses: [dujinyan@mail.ahnu.edu.cn](mailto:dujinyan@mail.ahnu.edu.cn) (J. Y. Du)

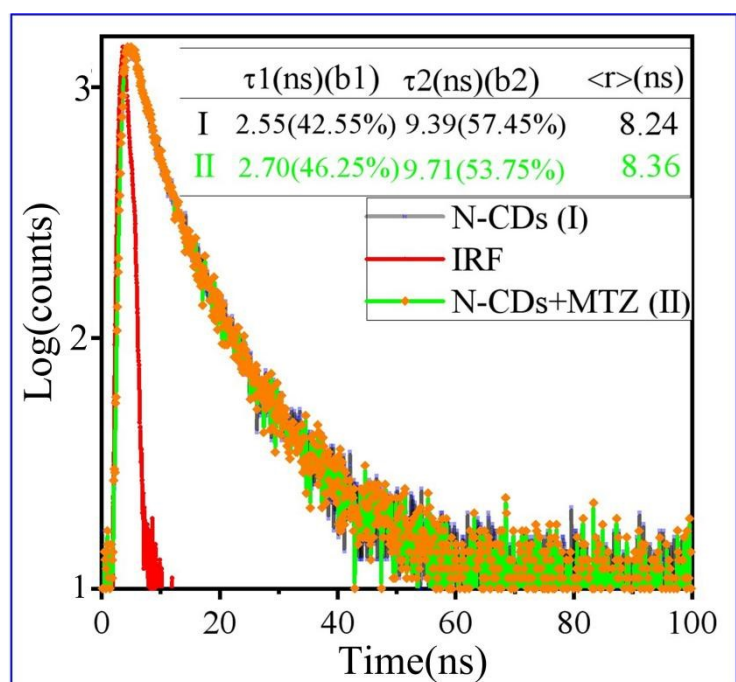

**Fig. S1** Time-resolved decays of the N-CDs (blue dots and gray line) and N-CDs + MTZ (orange dots and green line) in aqueous solution.

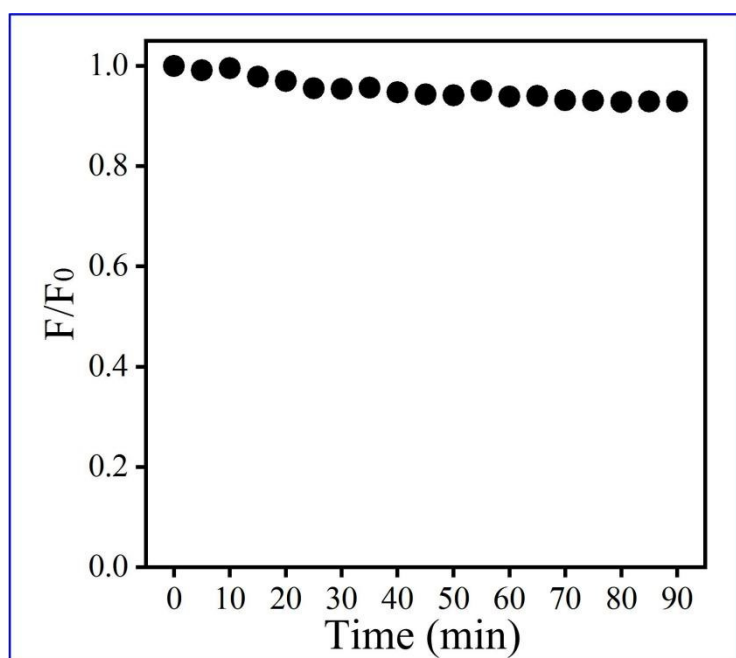

**Fig. S2** Time effect on the stability of the N-CDs under irradiation by 365 nm UV for 90 min.

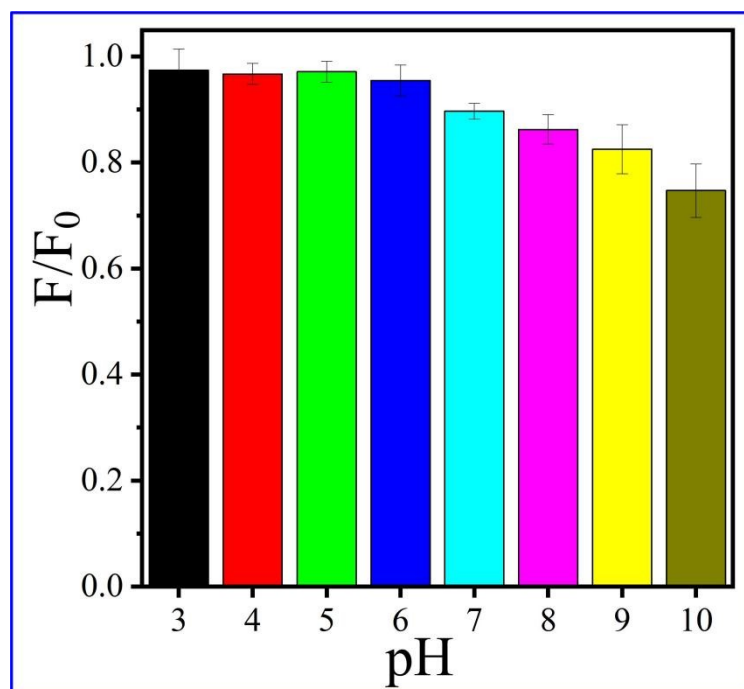

**Fig. S3** The pH stability of the N-CDs.

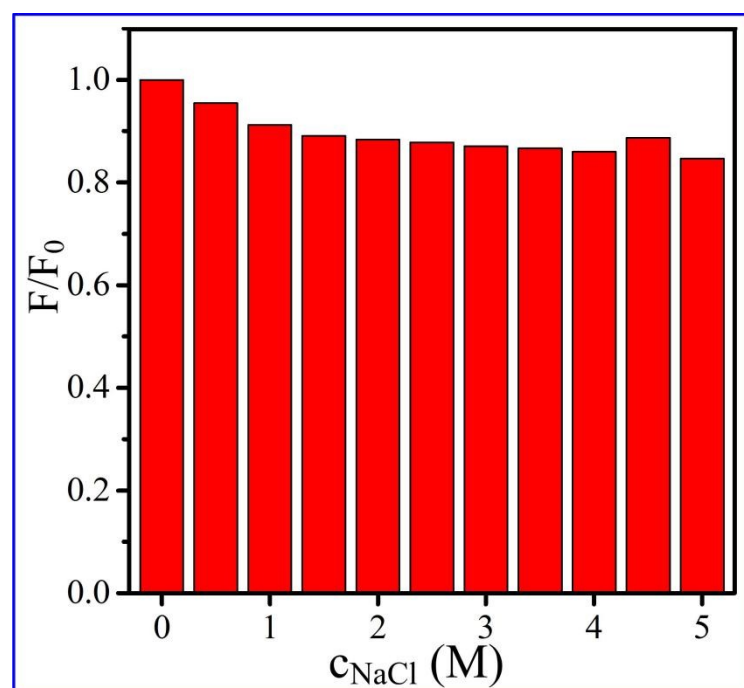

**Fig. S4** The salt stability of the N-CDs.

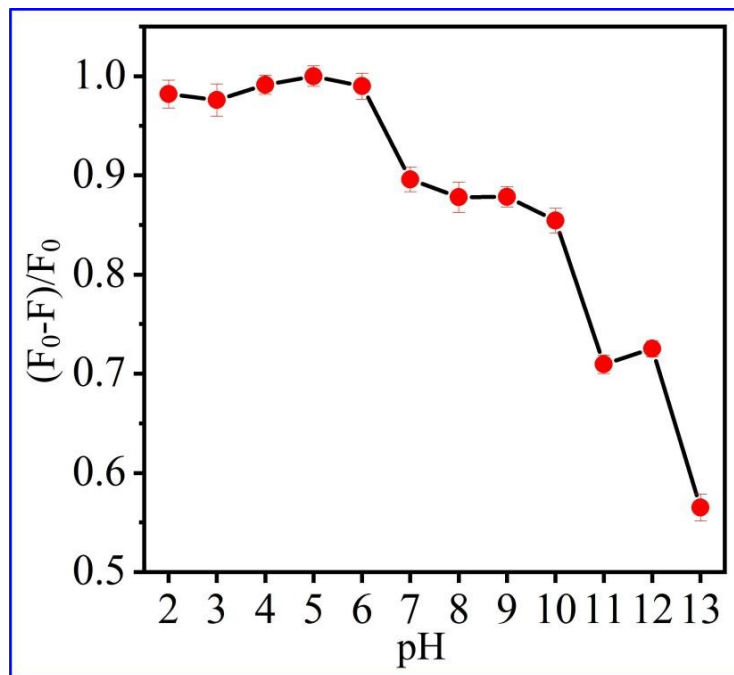

**Fig. S5** Fluorescence response of the N-CDs to MTZ at different pH values.

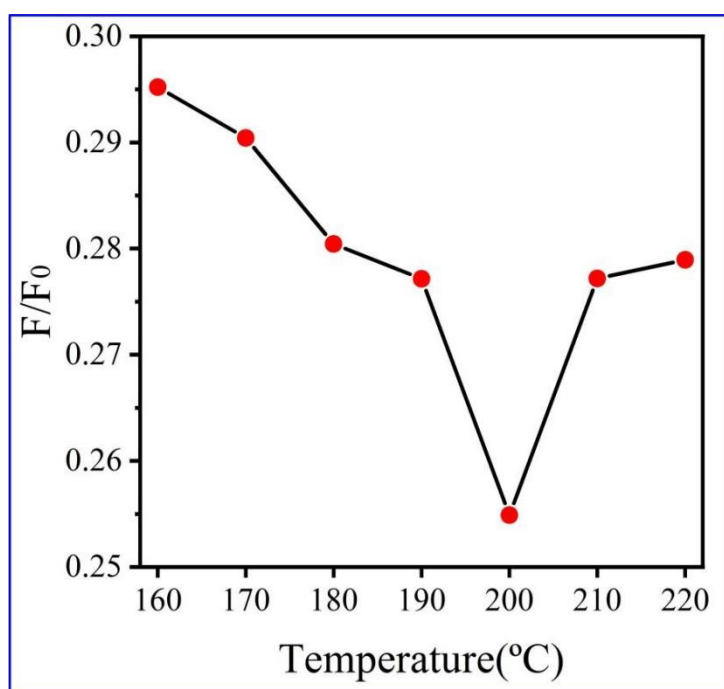

**Fig. S6** Dependency of fluorescence response of the N-CDs to MTZ on synthetic temperature.

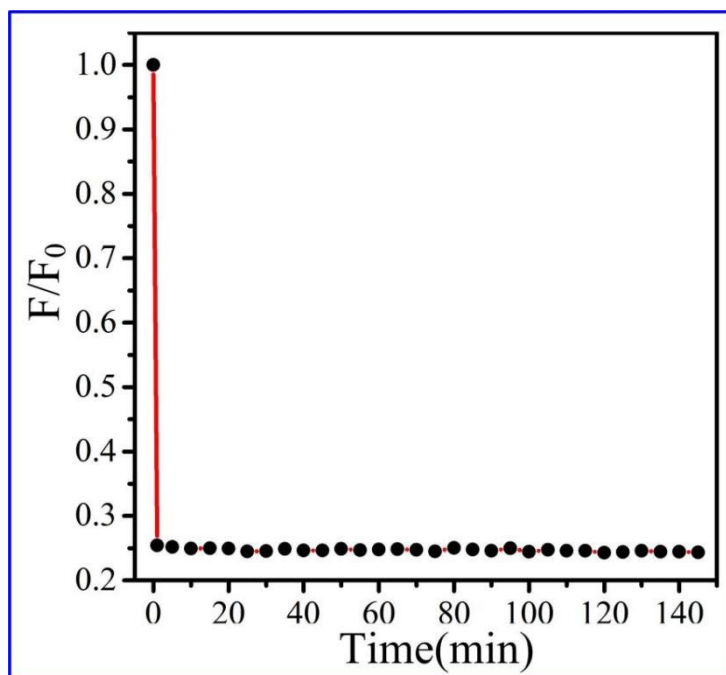

**Fig. S7** Time-dependent fluorescence intensity ratio of the N-CDs with the addition of MTZ at room temperature ( $[MTZ] = 500 \mu M$ ).

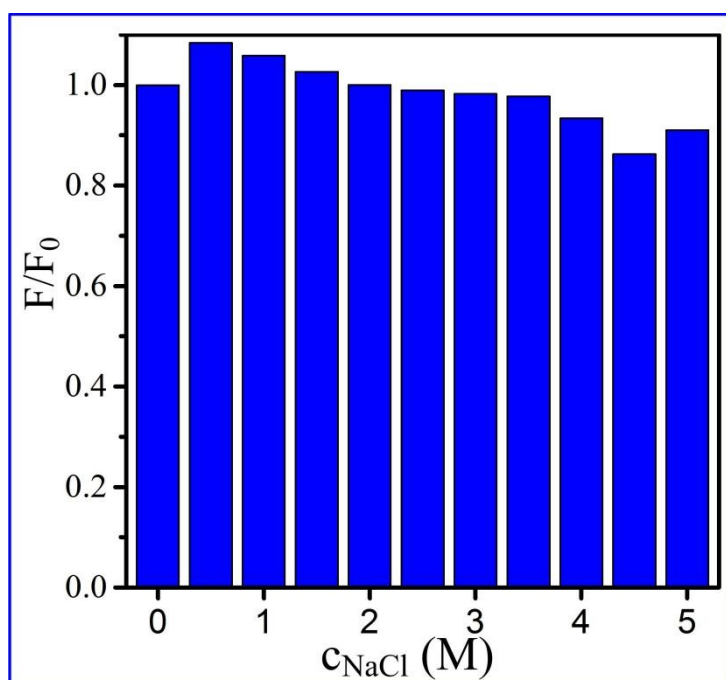

**Fig. S8** The salt stability of N-CDs upon the addition of MTZ.
